# Supplementary material for: Facile synthesis of graphene-clamped nanostructured SnO2 materials for lithium-ion batteries
Source: Royal Society of Chemistry journal article supplement (doi:10.1039/c4ra10120k), 2014-01-01
Supplement: c4ra10120k1.pdf [file c4ra10120k1.pdf]

## Supporting Information

### **Facile Synthesis of Graphene Clamped SnO<sub>2</sub> Nanostructured Materials for Lithium-Ion Batteries**

Yanzhong Hong,<sup>1</sup> Jianyin Zhang,<sup>1</sup> Zhiyong Wang,<sup>1\*</sup> Joseph J. Stankovich,<sup>2</sup> and Xianbo Jin<sup>1,2\*</sup>

<sup>1</sup>College of Chemistry and Molecular Sciences, Hubei Key Laboratory of

Electrochemical Power Sources, Wuhan University, Wuhan, 430072, P.R. China.

<sup>2</sup>Oak Ridge National Laboratory, Oak Ridge, TN 37831, USA

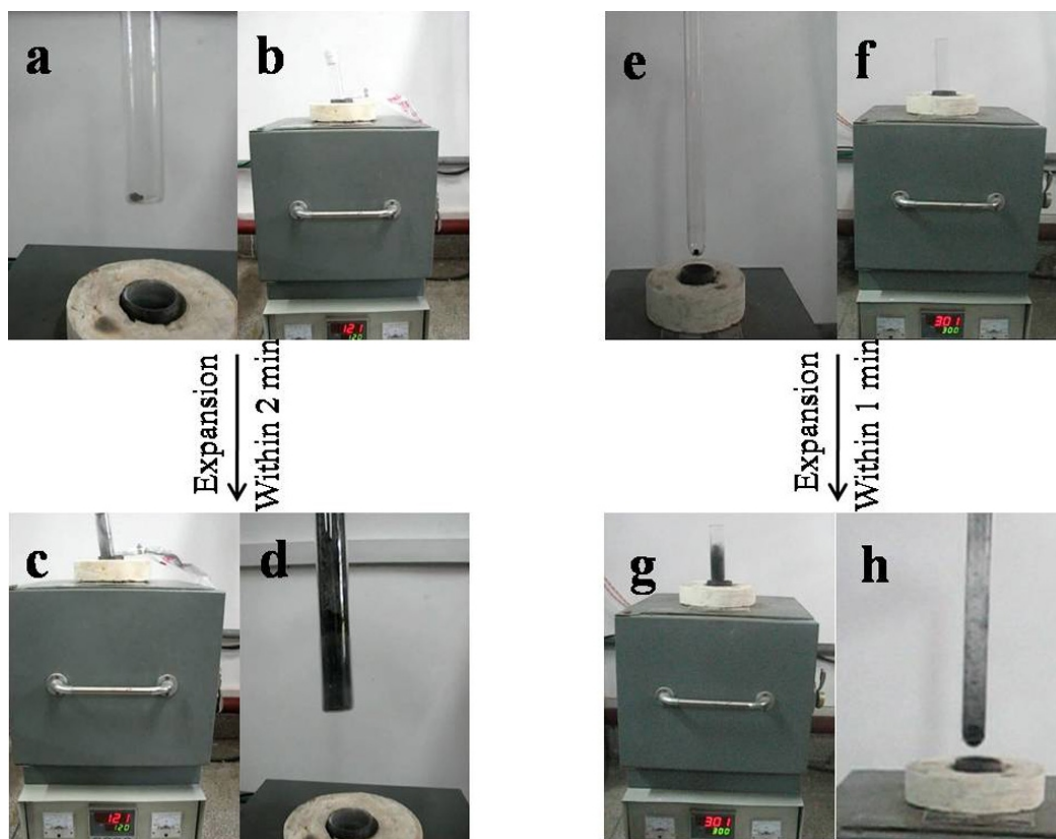

Fig. S1. Images a – d show the images before (a,b) and after (c, d) the expansion of SIGO at 120 °C within 2 minutes; Images e – f show the images before (e,f) and after (g, h) the expansion of SnO<sub>2</sub>/SIGO at 300 °C within 1 minute.

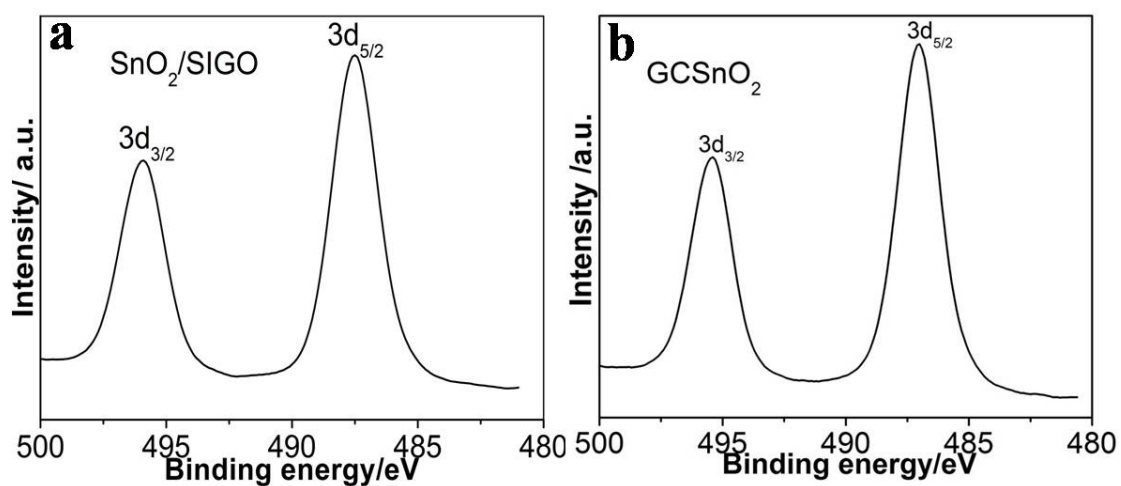

Fig. S2. a and b are the high resolution Sn 3d spectrums of SnO<sub>2</sub>/SIGO and GCSnO<sub>2</sub>, respectively.

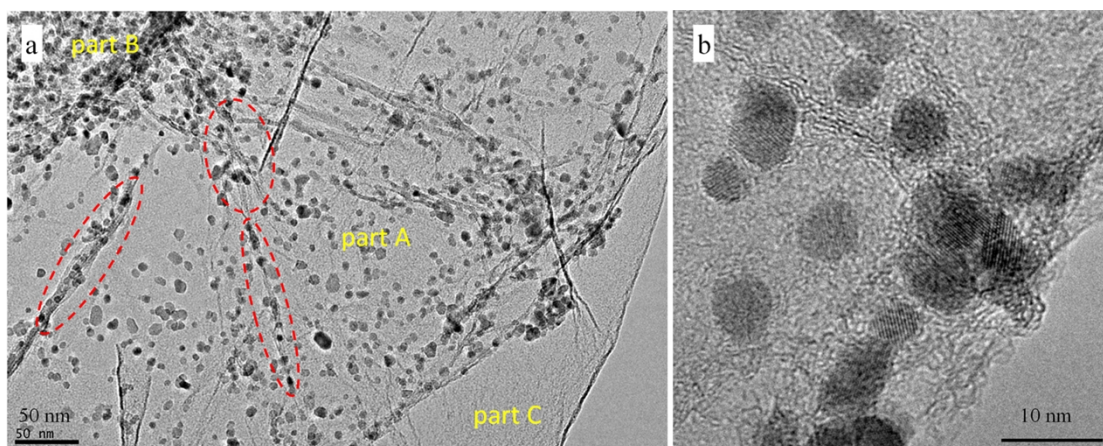

Fig. S3. a, typical TEM image of the GCSnO<sub>2</sub> and b, one high magnification observation of the rim of part A in (a).

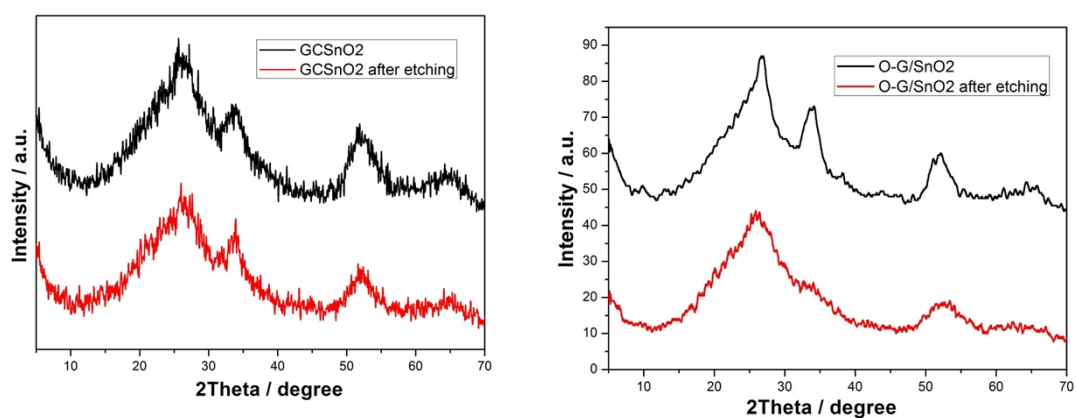

Fig. S4. The XRD patterns of the GCSnO<sub>2</sub> (a) and O-G/SnO<sub>2</sub> (b) before and after etching in 5 M HCl for 3 h under ultrasonic.

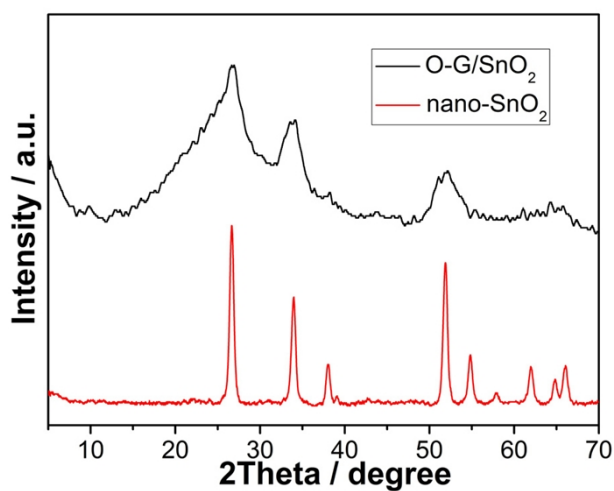

Fig. S5. The X-ray diffraction (XRD) patterns of the nano-SnO<sub>2</sub> and O-G/SnO<sub>2</sub>.

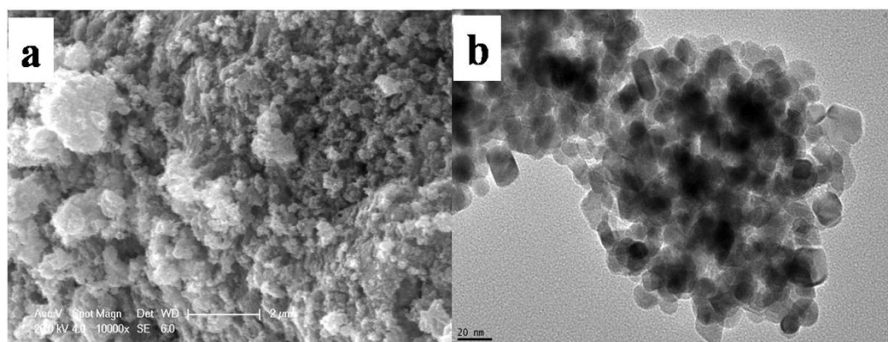

Fig. 6. SEM (a) and TEM (b) images of the nano-SnO<sub>2</sub>.

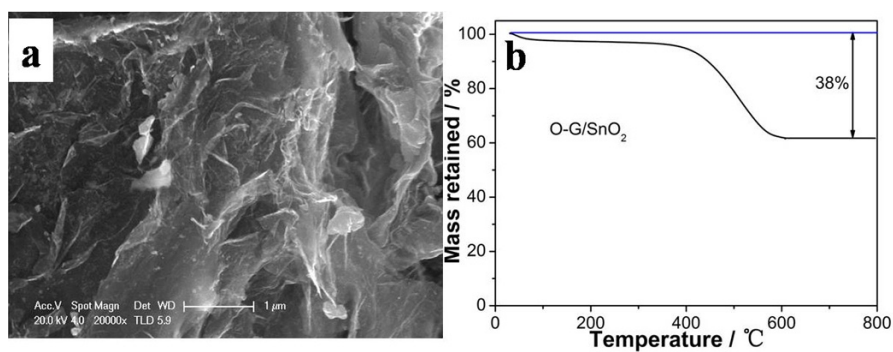

Fig. S7. The SEM image (a) and Thermo-gravimetric Analysis (b) of the O-G/SnO<sub>2</sub>.

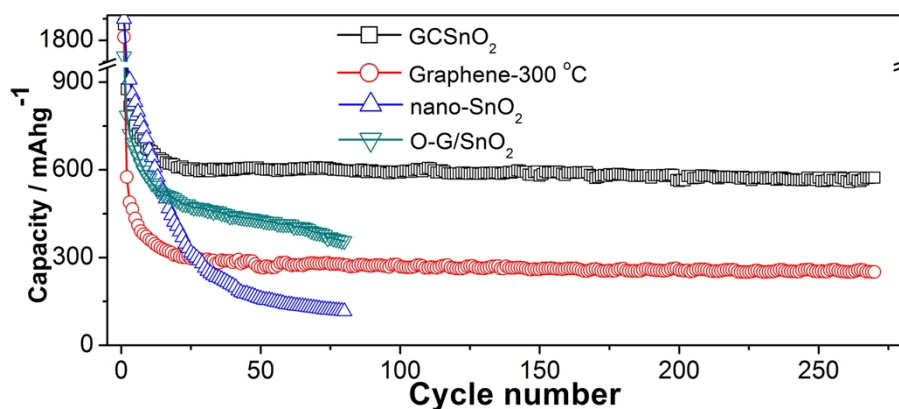

Fig. S8. A comparison of the Cycling performances of GCSnO<sub>2</sub>, graphene-300°C, nano-SnO<sub>2</sub> and O-G/SnO<sub>2</sub>.

Table S1. Performance of typical graphene/SnO<sub>2</sub> composite materials for lithium batteries during cycling with an upper potential limit of 2 V versus the lithium electrode.

| Component                  | Test Condition        | Initial Capacity / mAh g <sup>-1</sup><br>(the first cycle Efficiency) | Remaining Capacity / mAh g <sup>-1</sup> | Decay Rate (%) | Ref       |
|----------------------------|-----------------------|------------------------------------------------------------------------|------------------------------------------|----------------|-----------|
| RGO/SnO <sub>2</sub>       | 50mA/g<br>0.005-2.00V | 1080mAh/g<br>(50.4%)                                                   | 649mAh/g<br>(30 <sup>th</sup> )          | 1.33%          | 23        |
| SnO <sub>2</sub> -graphene | 100mA/g<br>0.01-2.00V | 819mAh/g<br>(49%)                                                      | 626mAh/g<br>(50 <sup>th</sup> )          | 0.47%          | 24        |
| SnO <sub>2</sub> /graphene | 50mA/g<br>0.05-2.00V  | 810mAh/g<br>(43%)                                                      | 570mAh/g<br>(30 <sup>th</sup> )          | 1%             | 32        |
| SnO <sub>2</sub> /graphene | 67mA/g<br>0.01-2.00V  | 978mAh/g<br>(57.5%)                                                    | 840mAh/g<br>(30 <sup>th</sup> )          | 0.46%          | 49        |
| SnO <sub>2</sub> -GNS      | 0.2C<br>0.005-2.00V   | 950mAh/g<br>(68%)                                                      | 550mAh/g<br>(100 <sup>th</sup> )         | 0.44%          | 50        |
| GCSnO <sub>2</sub>         | 200mA/g<br>0.02-2.00v | 858mAh/g<br>(42%)                                                      | 572mAh/g<br>(270 <sup>th</sup> )         | 0.11%          | This Work |
